# Supplementary material
Source: HighWire-hosted journal article supplement (https://www.rcpjournals.org/highwire/filestream/13957/field_highwire_adjunct_files/1/Botham_supplementary_material_S2.pdf)
Supplement: Botham_supplementary_material_S2.pdf [file Botham_supplementary_material_S2.pdf]

## Appendix 2. Study characteristics and quality

| Author<br>Year<br>Location                                                                      | Study design | Aspect of personalised medicine | Study population                                                                                | Sample size (n)                            | Age (in years)                                            | Gender         | MMAT score |
|-------------------------------------------------------------------------------------------------|--------------|---------------------------------|-------------------------------------------------------------------------------------------------|--------------------------------------------|-----------------------------------------------------------|----------------|------------|
| Blanchette (2014)<br>Canada (7)                                                                 | Quantitative | Somatic DNA mutation analysis   | Patients with advanced solid tumours                                                            | 98                                         | Inclusion- $\geq 18$<br>Median- 59<br>Range- 22-77        | 76% F<br>24% M | 4          |
| Bombard (2014)<br>Canada (8)                                                                    | Qualitative  | Gene expression profiling       | Early-stage breast cancer patients and oncologists                                              | Patients (n = 28)<br>Oncologists (n = 14)  | Inclusion- not specified<br>Median- 50-59<br>Range- 30-79 | 100% F         | 4          |
| Bombard (2014)<br>Canada (9)                                                                    | Qualitative  | Gene expression profiling       | Early-stage breast cancer patients                                                              | 28                                         | Inclusion- not specified<br>Median- 50-59<br>Range- 30-79 | 100% F         | 4          |
| Ciardiello (2016)<br>Argentina, China, France, Germany, Italy, Spain, UK (10)                   | Quantitative | Somatic DNA mutation analysis   | Patients with cancer (breast, lung or colorectal), diagnosed in the past 5 years and physicians | Patients (n = 811)<br>Physicians (n = 895) | 25-35: 2%<br>36-45: 13%<br>46-55: 27%<br>>55: 58%         | 54% F<br>46% M | 3          |
| Garfield (2015)<br>US (11)                                                                      | Quantitative | Somatic DNA mutation analysis   | Members of the public                                                                           | 602                                        | Inclusion- >30<br>Mean- 52.99                             | 52% F<br>48% M | 5          |
| *Please note that the two studies by Bombard (2014) (8, 9) used the same group of participants. |              |                                 |                                                                                                 |                                            |                                                           |                |            |

**Appendix 2. Study characteristics and quality (cont.)**

| <b>Author<br/>Year<br/>Location</b> | <b>Study<br/>design</b> | <b>Aspect of<br/>personalised<br/>medicine</b>                                    | <b>Study<br/>population</b>                                                        | <b>Sample size<br/>(n)</b>                                           | <b>Age (in years)</b>                                                         | <b>Gender</b>  | <b>MMAT<br/>score</b> |
|-------------------------------------|-------------------------|-----------------------------------------------------------------------------------|------------------------------------------------------------------------------------|----------------------------------------------------------------------|-------------------------------------------------------------------------------|----------------|-----------------------|
| Giuse<br>(2016)<br>US (12)          | Quantitative            | Somatic DNA<br>mutation<br>analysis                                               | Patients with<br>melanoma and<br>caregivers                                        | Patients<br>(n = 80)<br>Caregivers<br>(n = 28)                       | Inclusion- ≥18<br>Mean- 57                                                    | 52% F<br>48% M | 4                     |
| Gray<br>(2012)<br>US (13)           | Mixed<br>methods        | Somatic DNA<br>mutation<br>analysis                                               | Patients with<br>lung, colorectal or<br>breast cancer                              | 69                                                                   | Inclusion- >18<br>Median- 59<br>Range- 32-86                                  | 71% F<br>29% M | 4                     |
| Halverson<br>(2016)<br>US (14)      | Qualitative             | Somatic DNA<br>mutation<br>analysis                                               | Oncology<br>patients and<br>patients with<br>undiagnosed<br>genetic<br>conditions. | Oncology<br>patients<br>(n= 19)<br>Diagnostic<br>odyssey<br>(n = 20) | Oncology<br>patients'<br>range- 29-67<br>Diagnostic<br>odyssey<br>range: 1-45 | 61% F<br>49% M | 3                     |
| Kuderer<br>(2017)<br>US (15)        | Quantitative            | Personalised<br>medicine in<br>clinical trials-<br>multiple testing<br>modalities | Triple negative<br>breast cancer<br>patients                                       | 15                                                                   | Inclusion- not<br>specified<br>Median- 54<br>Range- 37-77                     | 100% F         | 5                     |
| Lemech<br>(2015)<br>UK (16)         | Quantitative            | Personalised<br>medicine in<br>clinical trials-<br>research<br>biopsies           | Cross section of<br>oncology patients<br>referred for phase<br>I clinical trial.   | 56                                                                   | Inclusion- not<br>specified<br>Median- 63<br>Range- 36-75                     | 38% F<br>62% M | 3                     |

**Appendix 2. Study characteristics and quality (cont.)**

| <b>Author<br/>Year<br/>Location</b>    | <b>Study<br/>design</b> | <b>Aspect of<br/>personalised<br/>medicine</b>                           | <b>Study<br/>population</b>                               | <b>Sample<br/>size (n)</b> | <b>Age (in years)</b>                                                  | <b>Gender</b>      | <b>MMAT<br/>score</b> |
|----------------------------------------|-------------------------|--------------------------------------------------------------------------|-----------------------------------------------------------|----------------------------|------------------------------------------------------------------------|--------------------|-----------------------|
| Lipkus<br>(2011)<br>US (17)            | Quantitative            | Somatic DNA<br>mutation analysis                                         | Early-stage<br>breast cancer<br>patients.                 | 130                        | Inclusion- $\geq 18$<br>Mean- 59.1                                     | 100% F             | 4                     |
| McDaniels<br>(2019)<br>US (18)         | Quantitative            | Somatic DNA<br>mutation analysis                                         | Cancer patients<br>(breast, colon,<br>melanoma,<br>lung). | 76                         | Inclusion- not<br>specified<br>Mean- 54<br>Range- 21-84                | 60.3% F<br>39.7% M | 4                     |
| Pellegrini<br>(2011)<br>France<br>(19) | Qualitative             | Gene expression<br>profile                                               | Breast cancer<br>patients                                 | 37                         | Inclusion- not<br>specified<br>Mean- 55<br>Range- 35-69                | 100% F             | 5                     |
| Perry<br>(2016)<br>Germany<br>(20)     | Qualitative             | Personalised<br>medicine in<br>clinical trials-<br>genomic<br>sequencing | Colorectal<br>cancer patients                             | 40                         | 18-40: 7.5%<br>41-60: 27.5%<br>61-70: 42.5%<br>71-80: 20%<br>>80: 2.5% | 35% F<br>65% M     | 5                     |
| Richman<br>(2011)<br>US (21)           | Quantitative            | Gene expression<br>profile                                               | Early-stage<br>breast cancer<br>patients                  | 78                         | Inclusion- $\geq 18$<br>Mean- 58<br>Range 38-83                        | 100% F             | 4                     |
| Rogith<br>(2016)<br>US (22)            | Quantitative            | Somatic DNA<br>mutation analysis<br>and personalised<br>cancer therapy   | Breast cancer<br>patients.                                | 100                        | Inclusion- $\geq 18$<br>Median- 56<br>Range- 26-84                     | 100% F             | 3                     |
